# Supplementary material for: A curcumin-based molecular probe for near-infrared fluorescence imaging of tau fibrils in Alzheimer's disease
Source: Royal Society of Chemistry journal article supplement (doi:10.1039/c5ob01847a), 2015-01-01
Supplement: c5ob01847a1.pdf [file c5ob01847a1.pdf]

## Supplemental Information

### Curcumin-based Molecular Probe for Near-Infrared Fluorescence Imaging of Tau Fibrils in Alzheimer's Disease

Kwang-su Park, Yujin Seo, Mi Kyoung Kim, Kyungdo Kim, Yun Kyung Kim, Hyunah Choo,\* and  
Youhoon Chong\*

## Contents

|                                                                                                            |     |
|------------------------------------------------------------------------------------------------------------|-----|
| 1. Synthetic procedures and characterization of newly synthesized compounds .....                          | S2  |
| 2. Expression and purification of tau protein .....                                                        | S11 |
| 3. Preparation of aggregated tau protein .....                                                             | S12 |
| 4. Thioflavin S binding assay ( <b>Figure S1, Figure S2</b> ).....                                         | S13 |
| 5. Atomic Force Microscopy ( <b>Figure S3</b> ).....                                                       | S14 |
| 6. Fluorescence of the curcumin derivatives ( <b>1a–1e</b> ) with aggregated tau ( <b>Figure S4</b> )..... | S15 |
| 7. <i>In vitro</i> tau-binding assay of <b>1c</b> ( <b>Figure S5</b> ).....                                | S17 |
| 8. Titration of <b>1c</b> with tau aggregate ( <b>Figure S6</b> ).....                                     | S18 |
| 9. Fluorescence of the curcumin derivative <b>1c</b> with A $\beta$ fibrils ( <b>Figure S7</b> ).....      | S19 |

|    |                                                                                   |
|----|-----------------------------------------------------------------------------------|
| 21 | 10. Detection of the tau aggregates by <b>1c</b> in SHSY-5Y cells ( <b>Figure</b> |
| 22 | <b>S8</b> ).....S20                                                               |

## 23 1. Synthetic procedures and characterization of newly synthesized compounds

24 **Materials and reagents.** All chemical reagents, including heparin sodium salt and thioflavin  
25 S were purchased from Sigma-Aldrich, TCI, or Alfa. Dulbecco's modified Eagle medium  
26 (DMEM), penicillin, streptomycin, and fetal bovine serum (FBS) were purchased from  
27 Invitrogen. TransIT-LT1 for transfection was purchased from Mirus. Nuclear magnetic  
28 resonance spectra were recorded on a Bruker 400 AMX spectrometer (Karlsruhe, Germany) at  
29 400 MHz for  $^1\text{H}$  NMR and 75 MHz (or 100 MHz or 125 MHz) for  $^{13}\text{C}$  NMR with  
30 tetramethylsilane as an internal standard. High resolution FAB mass spectrometric data  
31 (HRMS-FAB) were obtained at Korea Basic Science Institute (Daegu, Korea) and reported in  
32 the form of  $m/z$  (intensity relative to base peak=100). Fluorescence was recorded using a  
33 SpectraMax M2e (Molecular Devices, USA). Fluorescence images were obtained through  
34 confocal microscopy (Zeiss LSM701 confocal, Carl Zeiss).

35

### 36 3,5-Dibromoaniline (**3a**)<sup>1</sup>:

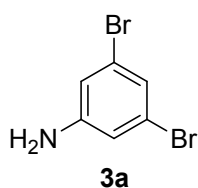

37

38 To a solution of 2,6-dibromo-4-nitroaniline **2** (1.0 g, 3.4 mmol) in EtOH (5 mL) were added  
39  $\text{NaNO}_2$  (0.3 g, 4.0 mmol) and 5 drops of  $\text{H}_2\text{SO}_4$ . The resulting mixture was stirred for 4 h at  
40  $80\text{ }^\circ\text{C}$ . After cooling to rt, the reaction mixture was washed with saturated aqueous  $\text{NaHCO}_3$   
41 solution, the organic layer was dried over  $\text{MgSO}_4$  and concentrated under reduced pressure.  
42 The residue was purified by column chromatography on silica gel (16:1 = hexanes:EtOAc) to

43 give 1,3-dibromo-5-nitrobenzene (0.4 g, 1.5 mmol, 44% yield) as yellow powder:  $^1\text{H}$  NMR  
44 (400 MHz,  $\text{CDCl}_3$ )  $\delta$  8.31 (d,  $J = 1.6$  Hz, 2H), 7.99 (t,  $J = 1.6$  Hz, 1H). To a solution of  
45 reduced iron powder (0.6 g, 10.7 mmol) and  $\text{NH}_4\text{Cl}$  (0.6 g, 10.7 mmol) in  $\text{H}_2\text{O}$  (5 mL) was  
46 added a solution of 1,3-dibromo-5-nitrobenzene (1.0 g, 3.56 mmol) in acetone (15 mL). The  
47 resulting mixture was stirred for 6 h at 80  $^\circ\text{C}$ , and then cooled to rt. After washing the mixture  
48 with saturated  $\text{NaHCO}_3$  solution, the organic layer was dried over  $\text{MgSO}_4$  and concentrated  
49 under reduced pressure. The residue was purified by column chromatography on silica gel  
50 (8:1 = hexanes:EtOAc) to give the desired, 3,5-dibromoaniline (**3a**) (0.68g, 2.7 mmol, 76%  
51 yield) as yellow powder:  $^1\text{H}$  NMR (400 MHz,  $\text{CDCl}_3$ )  $\delta$  7.07 (s, 2H), 6.77 (s, 1H).

52 **3,5-Dibromo-*N,N*-dimethylaniline (**4a**):**

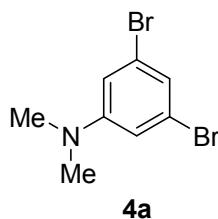

53  
54 To a solution of **3a** (0.5 g, 2.0 mmol) in  $\text{CH}_3\text{CN}$  (10 mL) were added  $\text{K}_2\text{CO}_3$  (0.5 g, 3.9 mmol)  
55 and  $\text{CH}_3\text{I}$  (0.2 mL, 3.9 mmol). The resulting mixture was stirred for 12 h at 65  $^\circ\text{C}$ , cooled to rt,  
56 and then filtered. The filtrate was concentrated under reduced pressure and the residue was  
57 purified by column chromatography on silica gel (16:1 = hexanes:EtOAc) to give 3,5-  
58 dibromo-*N,N*-dimethylaniline (**4a**) (0.3 g, 1.1 mmol, 53% yield) as yellow powder:  $^1\text{H}$  NMR  
59 (400 MHz,  $\text{CDCl}_3$ )  $\delta$  6.88 (s, 1H), 6.72 (d,  $J = 1.0$  Hz, 2H), 2.94 (s, 6H);  $^{13}\text{C}$  NMR (125 MHz,  
60  $\text{DMSO}-d_6$ )  $\delta$  152.2, 123.0, 119.6, 113.2, 39.7; HRMS (FAB) calcd for  $\text{C}_8\text{H}_9\text{Br}_2\text{N}$   $[\text{M}]^+$   
61 276.9102, found 276.9099.

62 **3,5-Dichloro-*N,N*-dimethylaniline (4b):**

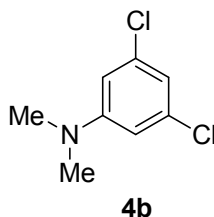

63  
64 To a solution of commercially available 3,5-dichloroaniline **3b** (0.3 g, 2.0 mmol) in CH<sub>3</sub>CN  
65 (10 mL) were added K<sub>2</sub>CO<sub>3</sub> (0.5 g, 3.9 mmol) and CH<sub>3</sub>I (0.2 mL, 3.9 mmol). The resulting  
66 mixture was stirred for 12 h at 65 °C, cooled to rt, and then filtered. The filtrate was  
67 concentrated under reduced pressure and the residue was purified by column chromatography  
68 on silica gel (8:1 = hexanes:EtOAc) to give 3,5-dichloro-*N,N*-dimethylaniline (**4b**) (0.2 g,  
69 1.00 mmol, 52% yield) as pale yellow syrup: <sup>1</sup>H NMR (400 MHz, CDCl<sub>3</sub>) δ 6.65 (t, *J* = 1.5  
70 Hz, 1H), 6.51 (d, *J* = 1.6 Hz, 1H), 2.92 (s, 6H); <sup>13</sup>C NMR (125 MHz, DMSO-*d*<sub>6</sub>) δ 151.8,  
71 134.5, 114.3, 110.0, 39.7; HRMS (FAB) calcd for C<sub>8</sub>H<sub>9</sub>Cl<sub>2</sub>N [M]<sup>+</sup> 189.0112, found 189.0114.

72 **3,5-Dimethoxy-*N,N*-dimethylaniline (4c):**

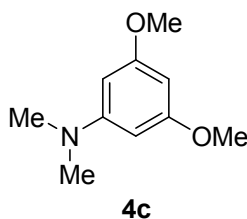

73  
74 To a solution of commercially available 3,5-dimethoxyaniline **3c** (0.29 g, 1.9 mmol) in  
75 CH<sub>3</sub>CN (5 mL) were added HCHO (37% in H<sub>2</sub>O, 1 mL) and NaBH<sub>3</sub>CN (0.34 g, 5.9 mmol)  
76 followed by HOAc (0.1 mL). The resulting mixture was stirred for 1 h and then HOAc (0.1  
77 mL) was added again. After washing with saturated NaHCO<sub>3</sub> solution, the organic layer was  
78 dried over MgSO<sub>4</sub> and concentrated under reduced pressure. The residue was purified by

79 column chromatography on silica gel (16:1 = hexane:EtOAc) to give 3,5-dimethoxy-*N,N*-  
80 dimethylaniline (**4c**) (0.2 g, 1.2 mmol, 62% yield) as pale yellow powder: <sup>1</sup>H NMR (400 MHz,  
81 CDCl<sub>3</sub>) δ 5.91 (s, 3H), 3.78 (s, 6H), 2.92 (s, 6H); <sup>13</sup>C NMR (125 MHz, DMSO-*d*<sub>6</sub>) δ 161.1,  
82 152.1, 91.4, 88.6, 54.7, 40.1; HRMS (FAB) calcd for C<sub>10</sub>H<sub>16</sub>NO<sub>2</sub> [M + H]<sup>+</sup> 182.1176, found  
83 182.1178.

84 **2,6-Dibromo-4-(dimethylamino)benzaldehyde (5a):**

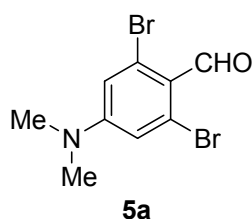

85  
86 To a solution of POCl<sub>3</sub> (0.09 mL, 1.0 mmol) and DMF (0.08 mL, 1.0 mmol) in CH<sub>2</sub>Cl<sub>2</sub> (5 mL)  
87 was added **4a** (0.25 g, 0.9 mmol) at 0 °C. The resulting mixture was stirred for 12 h at rt, and  
88 then water was added. The reaction mixture was neutralized by 2N NaOH and extracted with  
89 EtOAc. The combined organic layers was dried over MgSO<sub>4</sub> and concentrated under reduced  
90 pressure. The residue was purified by column chromatography (2:1 = hexanes:acetone) on  
91 silica gel to afford 2,6-dibromo-4-(dimethylamino)benzaldehyde (**5a**) (0.09 g, 0.3 mmol, 32%  
92 yield) as yellow syrup: <sup>1</sup>H NMR (400 MHz, Acetone-*d*<sub>6</sub>) δ 10.07 (s, 1H), 6.98 (s, 2H), 3.13 (s,  
93 6H); <sup>13</sup>C NMR (125 MHz, DMSO-*d*<sub>6</sub>) δ 188.6, 153.2, 127.2, 117.0, 115.7, 39.6; HRMS (FAB)  
94 calcd for C<sub>9</sub>H<sub>9</sub>Br<sub>2</sub>NO [M]<sup>+</sup> 304.9051, found 304.9053.

95 **2,6-Dichloro-4-(dimethylamino)benzaldehyde (5b):**

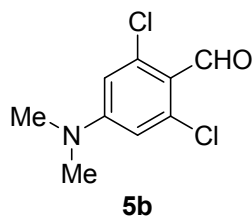

96

97 To a solution of POCl<sub>3</sub> (0.09 mL, 1.0 mmol) and DMF (0.08 mL, 1.0 mmol) in CH<sub>2</sub>Cl<sub>2</sub> (5 mL)  
 98 was added **4b** (0.17 g, 0.9 mmol) at 0 °C. The resulting mixture was stirred for 12 h at rt, and  
 99 then water was added. The reaction mixture was neutralized by 2N NaOH and extracted with  
 100 EtOAc. The combined organic layers was dried over MgSO<sub>4</sub> and concentrated under reduced  
 101 pressure. The residue was purified by column chromatography (4:1 = hexanes:EtOAc) on  
 102 silica gel to afford 2,6-dichloro-4-(dimethylamino)benzaldehyde (**5b**) (0.08 g, 0.4 mmol, 43%  
 103 yield) as yellow syrup: <sup>1</sup>H NMR (400 MHz, CDCl<sub>3</sub>) δ 10.30 (s, 1H), 6.53 (s, 2H), 3.05 (s, 6H);  
 104 <sup>13</sup>C NMR (125 MHz, DMSO-*d*<sub>6</sub>) δ 185.9, 152.9, 138.2, 115.6, 111.8, 39.6; HRMS (FAB)  
 105 calcd for C<sub>9</sub>H<sub>10</sub>Cl<sub>2</sub>NO [M + H]<sup>+</sup> 218.0134, found 218.0135.

106 **4-(Dimethylamino)-2,6-dimethoxybenzaldehyde (5c):**

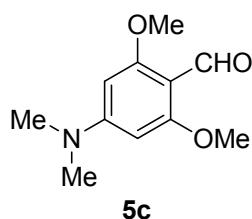

107

108 To a solution of POCl<sub>3</sub> (0.09 mL, 1.0 mmol) and DMF (0.08 mL, 1.0 mmol) in CH<sub>2</sub>Cl<sub>2</sub> (5 mL)  
 109 was added **4c** (0.16 g, 0.9 mmol) at 0 °C. The resulting mixture was stirred for 12 h at rt, and  
 110 then water was added. The reaction mixture was neutralized by 2N NaOH and extracted with  
 111 EtOAc. The combined organic layers was dried over MgSO<sub>4</sub> and concentrated under reduced  
 112 pressure. The residue was purified by column chromatography (6:1 = hexanes:EtOAc) on

silica gel to afford 4-(dimethylamino)-2,6-dimethoxybenzaldehyde (**5c**) (0.1 g, 0.5 mmol, 60%) yield as pale yellow powder: <sup>1</sup>H NMR (400 MHz, CDCl<sub>3</sub>) δ 10.22 (s, 1H), 5.73 (s, 2H), 3.88 (s, 6H), 3.09 (s, 6H); <sup>13</sup>C NMR (125 MHz, DMSO-*d*<sub>6</sub>) δ 183.9, 163.3, 155.6, 104.0, 87.2, 55.5, 39.7; HRMS (FAB) calcd for C<sub>11</sub>H<sub>16</sub>NO<sub>3</sub> [M + H]<sup>+</sup> 210.1125, found 210.1132.

**4-(Dimethylamino)-2,6-dimethylbenzaldehyde (5d):**

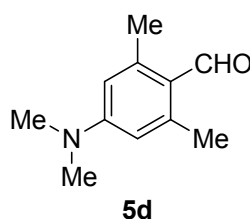

To a solution of POCl<sub>3</sub> (0.09 mL, 1.0 mmol) and DMF (0.08 mL, 1.0 mmol) in CH<sub>2</sub>Cl<sub>2</sub> (5 mL) was added commercially available N,N-3,5-tetramethylaniline **4d** (0.13 g, 0.9 mmol) at 0 °C. The resulting mixture was stirred for 12 h at rt, and then water was added. The reaction mixture was neutralized by 2N NaOH and extracted with EtOAc. The combined organic layers was dried over MgSO<sub>4</sub> and concentrated under reduced pressure. The residue was purified by column chromatography (2:1 = hexane:acetone) on silica gel to afford 4-(dimethylamino)-2,6-dimethylbenzaldehyde (**5d**) (0.06 g, 0.4 mmol, 40% yield) as pale yellow powder: <sup>1</sup>H NMR (400 MHz, CDCl<sub>3</sub>) δ 10.28 (s, 1H), 6.23 (s, 2H), 2.97 (s, 6H), 2.52 (s, 6H); <sup>13</sup>C NMR (125 MHz, DMSO-*d*<sub>6</sub>) δ 189.7, 152.6, 143.2, 120.7, 111.7, 39.3, 21.0; HRMS (FAB) calcd for C<sub>11</sub>H<sub>16</sub>NO [M + H]<sup>+</sup> 178.1226, found 178.1230.

**General procedure for the synthesis of the curcumin derivatives 1a ~ 1e. Synthesis of (1*E*,4*Z*,6*E*)-1,7-bis(2,6-dibromo-4-(dimethylamino)phenyl)-5-hydroxyhepta-1,4,6-trien-3-one (1a) is representative:**



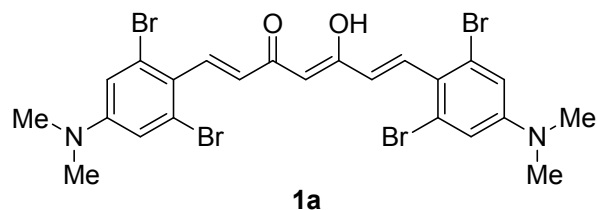

132

133 To a solution of acetylacetone (0.05 mL, 0.45 mmol) in DMF (1 mL) was added boron oxide  
 134 (0.03 g, 0.45 mmol) in a sealed tube. After stirring the reaction mixture for 30 min at 65 °C, a  
 135 solution of **5a** (0.28 g, 0.90 mmol) in DMF (1 mL), tributyl borate (0.25 mL, 0.90 mmol), and  
 136 *n*BuNH<sub>2</sub> (0.01 mL, 0.09 mmol) were added. The mixture was stirred for another 4 h at 90 °C  
 137 in the sealed tube. After cooling to rt, the reaction mixture was treated with 10% acetic acid in  
 138 water (10 mL) and stirred for 1 h at 75 °C. The reaction mixture was cooled to rt and extracted  
 139 with EtOAc three times. The combined organic layers were dried over MgSO<sub>4</sub> and, after  
 140 filtering, the filtrate was concentrated under reduced pressure. The residue was purified by  
 141 column chromatography on silica gel (Hexane:Acetone:Ether = 8:1:1) to give the desired  
 142 compound **1a** (0.17 g, 0.25 mmol, 56% yield) as orange solid: <sup>1</sup>H NMR (400 MHz, CDCl<sub>3</sub>) δ  
 143 7.74 (d, *J* = 16.0 Hz, 2H), 6.89 (s, 4H), 6.74 (d, *J* = 16.0 Hz, 2H), 5.82 (s, 1H), 2.98 (s, 12H);  
 144 <sup>13</sup>C NMR (100 MHz, DMSO-*d*<sub>6</sub>) δ 184.4, 152.1, 140.1, 130.5, 126.9, 123.3, 117.5, 103.6,  
 145 41.4; HRMS (FAB) calcd for C<sub>23</sub>H<sub>23</sub>Br<sub>4</sub>N<sub>2</sub>O<sub>2</sub> [M + H]<sup>+</sup> 674.8488, found 674.8493.

146 **(1E,4Z,6E)-1,7-bis(2,6-dichloro-4-(dimethylamino)phenyl)-5-hydroxyhepta-1,4,6-trien-**  
 147 **3-one (1b):**

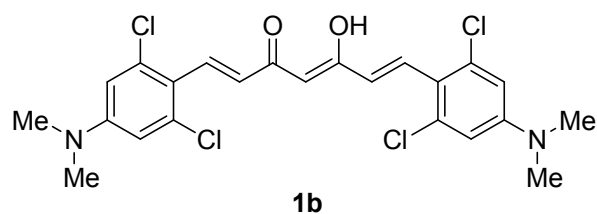

148

149 The desired compound was obtained as orange solid (0.09 g, 0.18 mmol, 41% yield) starting  
 150 from **5b**:  $^1\text{H}$  NMR (400 MHz,  $\text{CDCl}_3$ )  $\delta$  7.89 (d,  $J = 16.1$  Hz, 2H), 6.90 (d,  $J = 16.1$  Hz, 2H),  
 151 6.65 (s, 4H), 5.81 (s, 1H), 3.00 (s, 12H);  $^{13}\text{C}$  NMR (75 MHz,  $\text{DMSO-}d_6$ )  $\delta$  183.2, 151.1,  
 152 136.5, 134.3, 134.1, 127.0, 116.8, 112.6, 111.2, 103.4, 40.1; HRMS (FAB) calcd for  
 153  $\text{C}_{23}\text{H}_{23}\text{N}_2\text{O}_2$   $[\text{M} + \text{H}]^+$  499.0508, found 499.0487.

154 **(1*E*,4*Z*,6*E*)-1,7-bis(4-(dimethylamino)-2,6-dimethoxyphenyl)-5-hydroxyhepta-1,4,6-**  
 155 **trien-3-one (1c):**

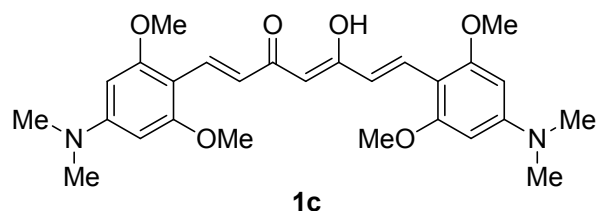

157 The desired compound was obtained as bright orange (0.15 g, 0.31 mmol, 68% yield) starting  
 158 from **5c**:  $^1\text{H}$  NMR (400 MHz,  $\text{CDCl}_3$ )  $\delta$  8.08 (d,  $J = 16.0$  Hz, 2H), 7.26 (s, 4H), 6.91 (d,  $J =$   
 159 16.0 Hz, 2H), 5.83 (s, 4H), 5.74 (s, 1H), 3.88 (s, 12H), 3.04 (s, 12H);  $^{13}\text{C}$  NMR (75 MHz,  
 160  $\text{DMSO-}d_6$ )  $\delta$  184.2, 161.5, 153.5, 131.7, 120.4, 101.8, 101.6, 88.6, 56.0, 31.2; HRMS (FAB)  
 161 calcd for  $\text{C}_{27}\text{H}_{35}\text{N}_2\text{O}_6$   $[\text{M} + \text{H}]^+$  483.2490, found 483.2483.

162 **(1*E*,4*Z*,6*E*)-1,7-bis(4-(dimethylamino)-2,6-dimethylphenyl)-5-hydroxyhepta-1,4,6-trien-**  
 163 **3-one (1d):**

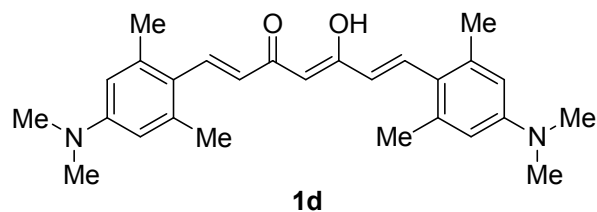

165 The desired compound was obtained as bright orange powder (0.12 g, 0.28 mmol, 62% yield)  
166 starting from **5d**:  $^1\text{H}$  NMR (400 MHz, Acetone- $d_6$ )  $\delta$  7.92 (d,  $J$  = 16.1 Hz, 2H), 6.51 (s, 4H),  
167 6.33 (d,  $J$  = 16.1 Hz, 2H), 5.93 (s, 1H), 2.99 (s, 12H), 2.42 (s, 12H);  $^{13}\text{C}$  NMR (75 MHz,  
168 DMSO- $d_6$ )  $\delta$  190.4, 153.3, 150.8, 143.7, 139.8, 121.3, 112.3, 40.1, 39.9, 21.5 (keto form),  
169 183.5, 153.3, 143.7, 139.8, 138.2, 124.5, 112.8, 40.1, 22.7 (enol form); HRMS (FAB) calcd  
170 for  $\text{C}_{27}\text{H}_{35}\text{N}_2\text{O}_2$   $[\text{M} + \text{H}]^+$  419.2693, found 419.2701.

171 **(1E,4Z,6E)-1,7-bis(4-(dimethylamino)phenyl)-5-hydroxyhepta-1,4,6-trien-3-one (1e)<sup>2</sup>:**

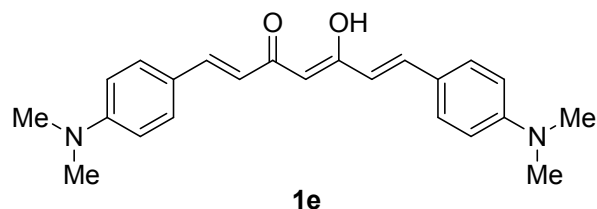

173 The desired compound was obtained as orange powder (0.11 g, 0.31 mmol, 68% yield)  
174 starting from **5e**:  $^1\text{H}$  NMR (400 MHz,  $\text{CDCl}_3$ )  $\delta$  7.59 (d,  $J$  = 15.7 Hz, 2H), 7.44 (d,  $J$  = 8.8 Hz,  
175 4H), 6.67 (d,  $J$  = 8.8 Hz, 4H), 6.43 (d,  $J$  = 15.7 Hz, 2H), 5.72 (s, 1H), 3.01 (s, 12H); HRMS  
176 (FAB) calcd for  $\text{C}_{23}\text{H}_{27}\text{N}_2\text{O}_2$   $[\text{M} + \text{H}]^+$  363.2067, found 363.2070.

177

## 178 References

- 179 1. Stephanie H. C.; James M. T. *J. Org. Chem.*, **2003**, 68, 8750.  
180 2. Waylon M. W.; Lucy A. H.; Steve F. A.; Lorraine M. D.; David L. VJ. *Bioorg. Med. Chem.*, **2005**,  
181 13, 3811.

182 **2. Expression and purification of tau protein.** To express the recombinant tau K18 protein,  
183 the cDNA that contained the His-tagged K18-tau protein was transformed in the *Escherichia*  
184 *coli* strain BL21(DE3). The transformed *E. coli* strain BL21(DE3) in LB medium containing  
185 ampicillin was inoculated with a stationary overnight culture. The culture was grown at 37 °C  
186 to an OD600 of 0.8–1.0, and protein expression was induced by the addition of 1 mM of  
187 isopropyl  $\beta$ -D-1-thiogalactopyranoside for 4 h. The cells were pelleted and sonicated.  
188 Recombinant tau was purified through a succession of Ni-Sepharose chromatography  
189 [equilibrated in 20 mM NaH<sub>2</sub>PO<sub>4</sub>, 500 mM NaCl, and 20 mM imidazole (pH 7.4), elution  
190 with 200 mM imidazole buffer]. The purity of the protein was verified on a Coomassie  
191 Brilliant Blue-stained sodium dodecyl sulfate-polyacrylamide gel. The elution buffer was  
192 changed to storage buffer (phosphate-buffered saline, PBS). The protein was concentrated and  
193 stored at -20 °C until use. The concentration of the purified tau was determined with the  
194 extinction coefficient at 280 nm (1,490 M<sup>-1</sup> cm<sup>-1</sup>).

195 **3. Preparation of aggregated tau protein.** Monomeric tau protein was prepared by  
196 incubating 50  $\mu$ M of the purified K18-tau protein in 25 mM Tris-HCl (pH 7.0), 50 mM NaCl,  
197 and 1 mM dithiothreitol (DTT) at 37 °C for 1 h in a LoBind tube (Eppendorf AG, Hamburg,  
198 Germany). After treatment with heparin (5  $\mu$ M), the resulting mixture was incubated for 72 h  
199 at 37 °C in a shaking incubator. The tau aggregate that was formed was confirmed by a ThS-  
200 binding assay and atomic force microscopy (AFM).

201 **4. Thioflavin S binding assay.** K18-tau fibril formation was confirmed by ThS fluorescence.  
202 Reactions comprising K18-tau fibrils (50  $\mu\text{M}$ ) and various concentrations of ThS (0, 0.01, 0.1,  
203 1, 10, and 100  $\mu\text{M}$ ) in PBS (pH 7.4) were analyzed at 440 nm (excitation) and 521 nm  
204 (emission), with an integration time of 1 s. Measurements were recorded with a SpectraMax  
205 spectrophotometer (Molecular Devices LLC) (Figure S1).

206 **Figure S1.** Thioflavin S binding assay of tau aggregates

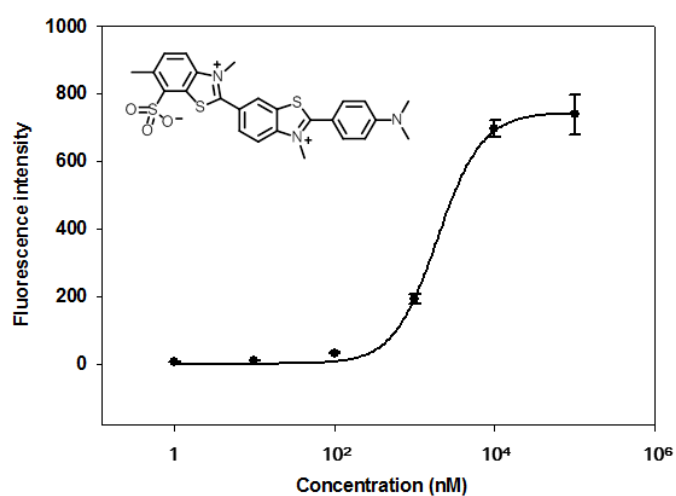

207

208 **Figure S2.** Fluorescence intensity of ThS (20  $\mu\text{M}$ ) with or without tau aggregates

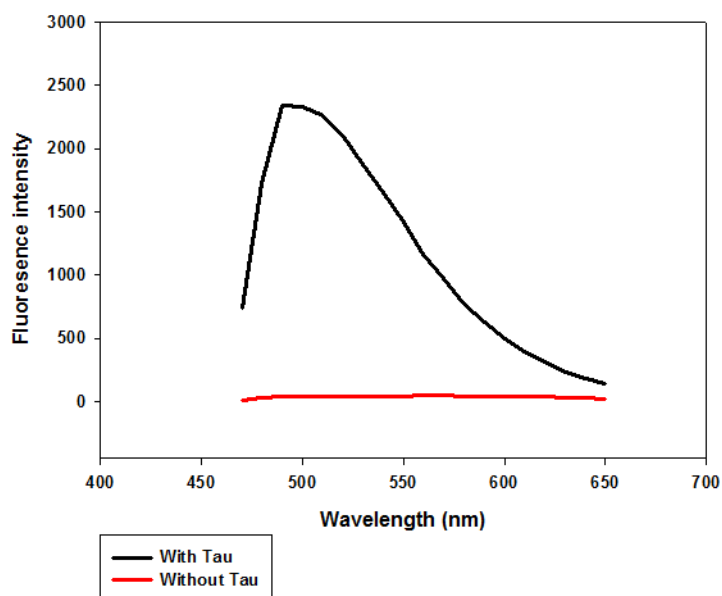

209

211 **5. Atomic Force Microscopy.** Fibril formation of K18-tau was further confirmed by AFM.  
212 K18-tau protein (50  $\mu$ M) was incubated in 25 mM Tris-HCl (pH 7.0), 50 mM NaCl, and 1  
213 mM DTT at 37 °C for 1 h in a LoBind tube (Eppendorf AG). After treatment with heparin (5  
214  $\mu$ M), the resulting mixture was incubated for 72 h at 37 °C in a shaking incubator. The  
215 aggregated tau protein was immobilized onto freshly cleaved mica. Excess protein was  
216 removed by washing with distilled water. AFM imaging was performed in noncontact mode  
217 in XE-100 (Park Systems, Suwon, Korea) with NCHR cantilevers (Park Systems) exhibiting a  
218 frequency of 6.39 KHz. The drive amplitude was set to 19.47 nm, and the amplitude set point  
219 was adjusted to 14.6 nm. (Figure S2).

220

221 **Figure S3.** An atomic force microscopic image confirming a tau aggregate (scale bar: 1  $\mu$ m)

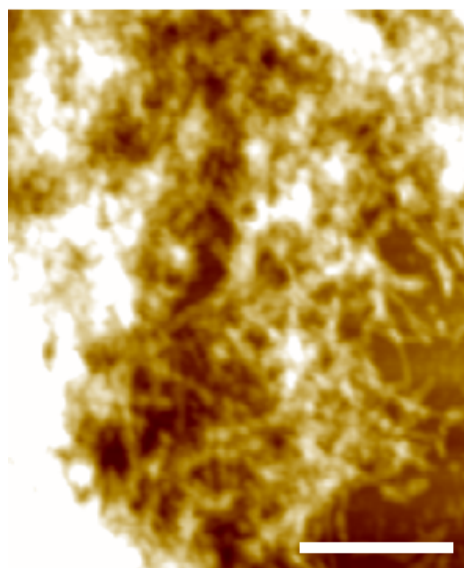

222

223 **6. Fluorescence of the curcumin derivatives (1a–1e) with aggregated tau.** Fluorescence of  
224 the curcumin derivatives (**1a–1e**) (50  $\mu$ M) were examined in the absence and presence of the  
225 preaggregated tau proteins (50  $\mu$ M) with optimized excitations and emissions for each of the  
226 compounds. Fluorescence was measured by SpectraMax (Molecular Devices LLC) in various  
227 solvents (Figures 2 and S4).



**Figure S4.** Solvent-dependent fluorescence of (a) curcumin and (b ~ f) its derivatives (**1a** ~ **1e**) in the absence of the preaggregated tau proteins

(a)

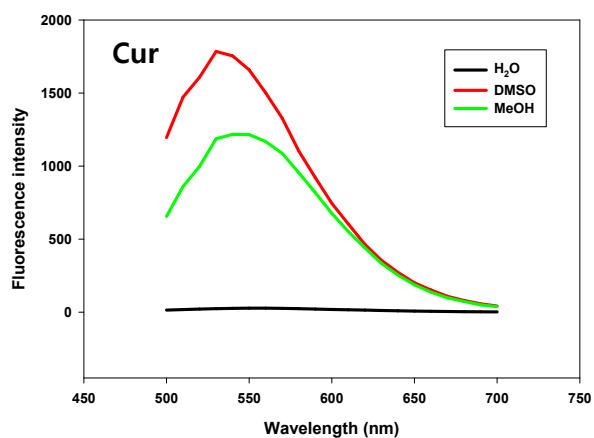

(b)

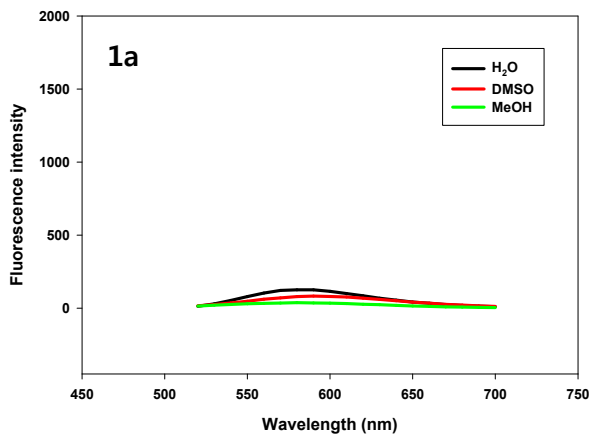

(c)

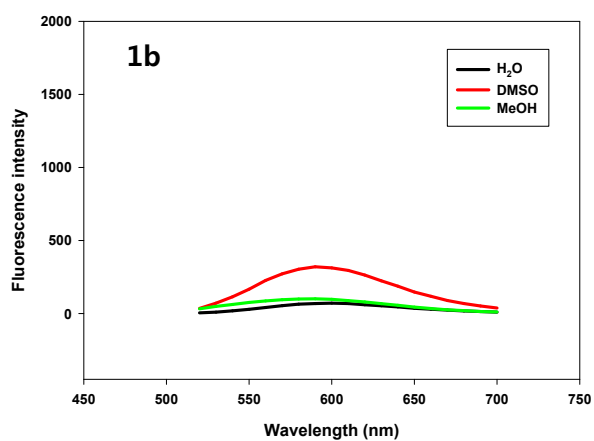

(d)

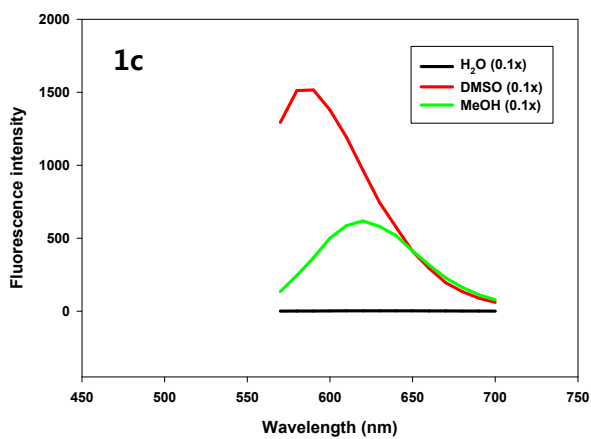

(e)

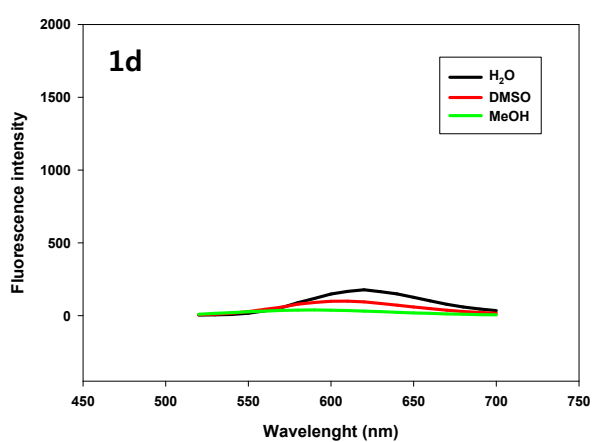

(f)

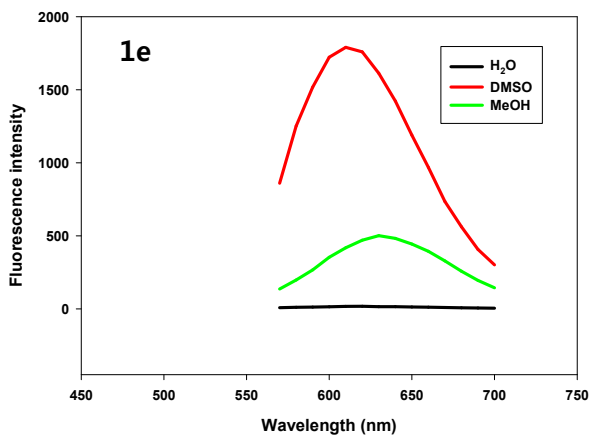

236 **7. *In vitro* tau-binding assay of 1c.** K18-tau fibrils (50  $\mu$ M) were incubated with increasing  
 237 concentrations of **1c** (0, 0.01, 0.1, 1, 10, and 100  $\mu$ M). The binding reactions were incubated  
 238 for 10 min at rt in 100  $\mu$ L of fibril incubation buffer [25 mM Tris-HCl (pH 7.0), 50 mM NaCl,  
 239 and 1 mM DTT]. The fluorescence of each sample was measured by SpectraMax (Molecular  
 240 Devices LLC) at an excitation of 520 nm and emission of 620 nm (Figure S3). The binding  
 241 data were analyzed with curve fitting software that calculated the  $K_d$  with a nonlinear  
 242 regression (Sigmaplot; Systat Software, Inc., San Jose, CA, USA). All of the experiments  
 243 were conducted in triplicate. The quantum yield of **1c** was calculated from the dose-response  
 244 curve obtained above with the following equation.<sup>1-2</sup>

$$\Phi(X) = \Phi(ST) \left( \frac{\text{Grad}(X)}{\text{Grad}(ST)} \right) \left( \frac{\eta(X)^2}{\eta(ST)^2} \right)$$

246 Where ST and X denote the standard and test sample, respectively;  $\Phi$  is the fluorescence quantum  
 247 yield; Grad is the gradient from the plot of integrated fluorescence intensity versa absorbance; and  $\eta$  is  
 248 the refractive index of the solvent. Fluorescein isothiocyanate was used as the standard.

249 **Figure S5. (A) Binding constant measurement of 1c with tau aggregates. (B) Linear concentration**  
 250 **dependence of 1c in PBS ( $R^2 = 0.9669$ ) indicates that 1c is not self-quenched with the range tested.**

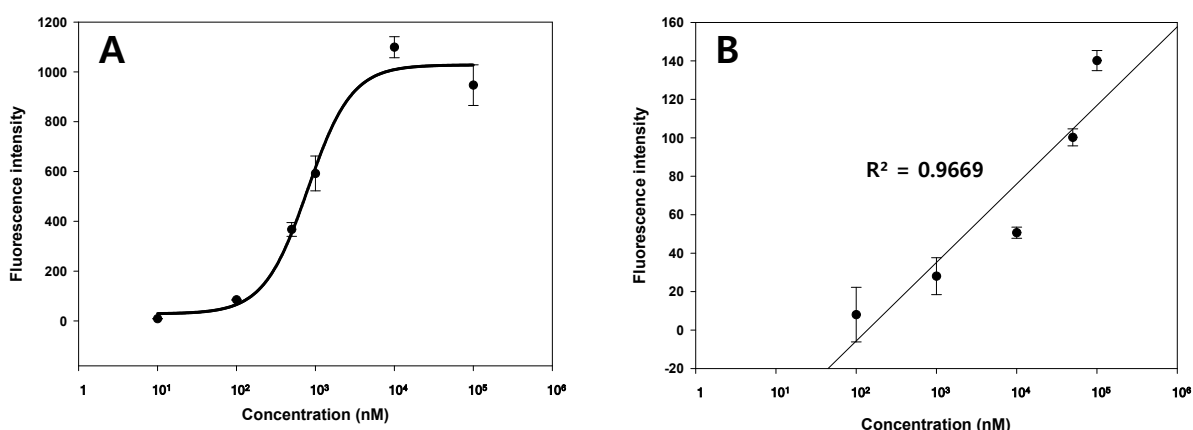

$$Y = y_0 + \frac{a}{1 + e^{-\left(\frac{x - x_0}{b}\right)}}$$

254 **8. Titration of 1c with tau aggregate.** Aggregate of tau was prepared by incubating 500  
255 ng/mL of the purified K18-tau protein in 25 mM Tris-HCl (pH 7.0), 50 mM NaCl at 37 °C  
256 for 72 h. The prepared tau aggregate was serially diluted (500, 250, 125, 62.5, 31.3, 15.6, 7.8,  
257 3.9, 2 ng/mL) using PBS pH 7.4. Each of the diluted tau aggregate was treated with **1c** (50  
258  $\mu$ M) and then, the fluorescence emission was monitored by SpectraMax (Molecular Devices  
259 LLC) after excitation at 520 nm.

260

261 **Figure S6.** Titration of **1c** (50  $\mu$ M) with tau aggregate in PBS (1% DMSO, pH 7.4)

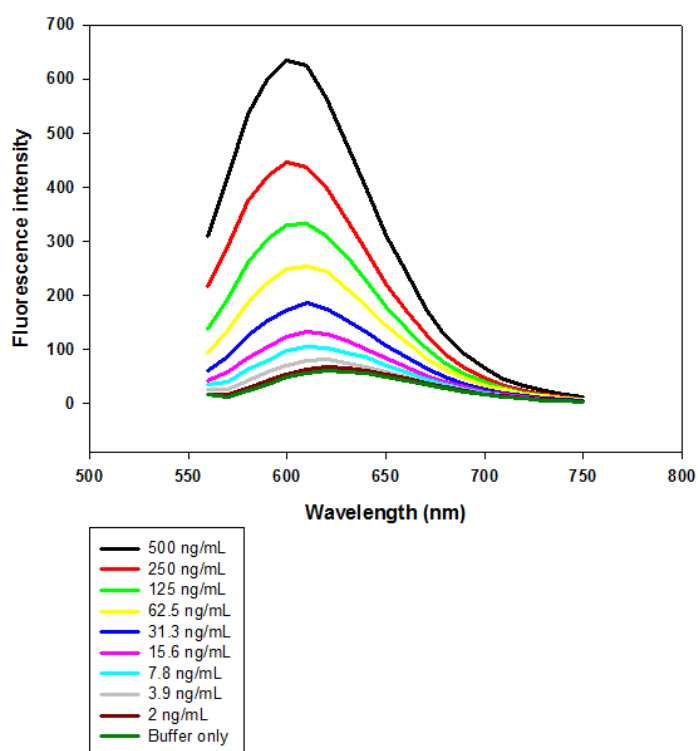

262

263

264 **9. Fluorescence of the curcumin derivative 1c with A $\beta$  fibrils.** The A $\beta$  fibril was prepared  
265 according to our previous publication.<sup>3</sup> Fluorescence of the curcumin derivative **1c** (50  $\mu$ M)  
266 was examined in the absence and presence of the preaggregated A $\beta$  (50  $\mu$ M) ( $\lambda_{\text{ex}}$  = 500 nm,  
267  $\lambda_{\text{em}}$  = 620 nm). Fluorescence was measured by SpectraMax (Molecular Devices LLC) in 25  
268 mM Tris-HCl, pH 7.0, 50 mM NaCl (Figure S5).

269

270 **Figure S7.** The fluorescence intensity of **1c** upon interaction with A $\beta$  fibrils in Tris-HCl  
271 (black solid line: with tau aggregate, black dashed line: with A $\beta$  fibrils, red lines: with neither  
272 tau aggregate nor A $\beta$ )

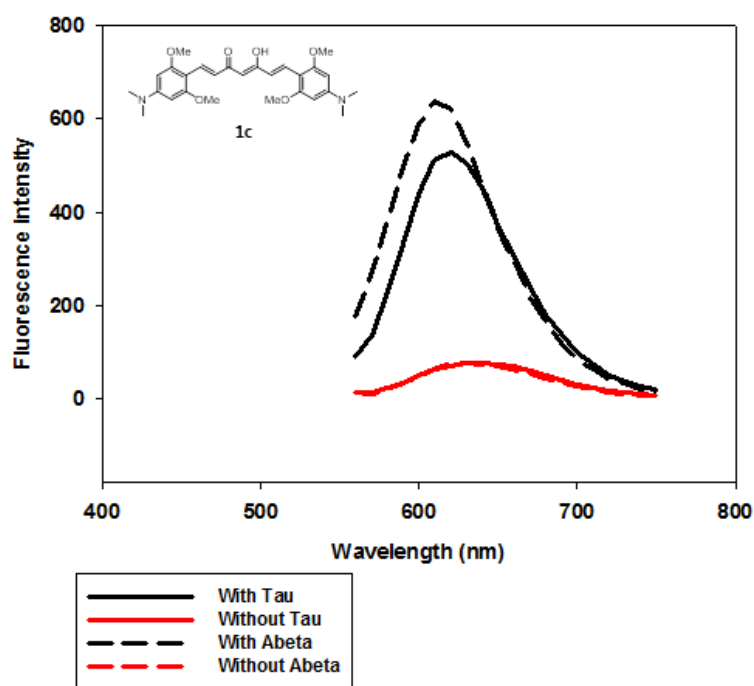

273

274 **10. Detection of the tau aggregates by 1c in SHSY-5Y cells.** Human neuroblastoma SH-  
275 SY5Y cells were purchased from ATCC (American Type Culture Collection, Manassas, VA,  
276 USA). For the fluorescence microscopic analysis, SH-SY5Y cells were seeded at  $5 \times 10^5$  in a  
277 glass-bottom cell culture dish (Nest Biotechnology Co., Ltd., Wuxi, China) and cultured in  
278 Dulbecco's Modified Eagle's Medium/F-12 medium with 10% fetal calf serum. Cells at 70%  
279 confluence were transfected with pCMV6-htau40-green fluorescent protein (GFP) (OriGene  
280 Technologies, Inc., Rockville, MD, USA) with TransIT-LT1 (Mirus Bio LLC). After 72 h, the  
281 cells were treated with **1c** (5  $\mu$ M) for 5 min and washed 3 times with PBS. The cells were then  
282 monitored by a Zeiss LSM701 confocal microscope (Carl Zeiss Microscopy GmbH) at 520  
283 nm for GFP and 620 nm for compound **1c**.

284 **Figure S8.** Confocal microscope images of the non-transfected and the tau-GFP-transfected  
 285 SHSY-5Y cells before or after treatment with **1c**. (A ~ B) SHSY-5Y cells without expression  
 286 of tau were observed by a confocal microscope (at 620 nm,  $\lambda_{\text{ex}}$  of **1c**) after treatment with **1c**:  
 287 (A) Fluorescence image and (B) differential interference contrast (DIC) image. (C ~ D)  
 288 Confocal microscope images of tau-GFP-transfected SHSY-5Y cells before treatment with **1c**:  
 289 (C) Fluorescence image and (D) differential interference contrast (DIC) image. White arrows  
 290 indicate tau aggregates in vacuole compartment.

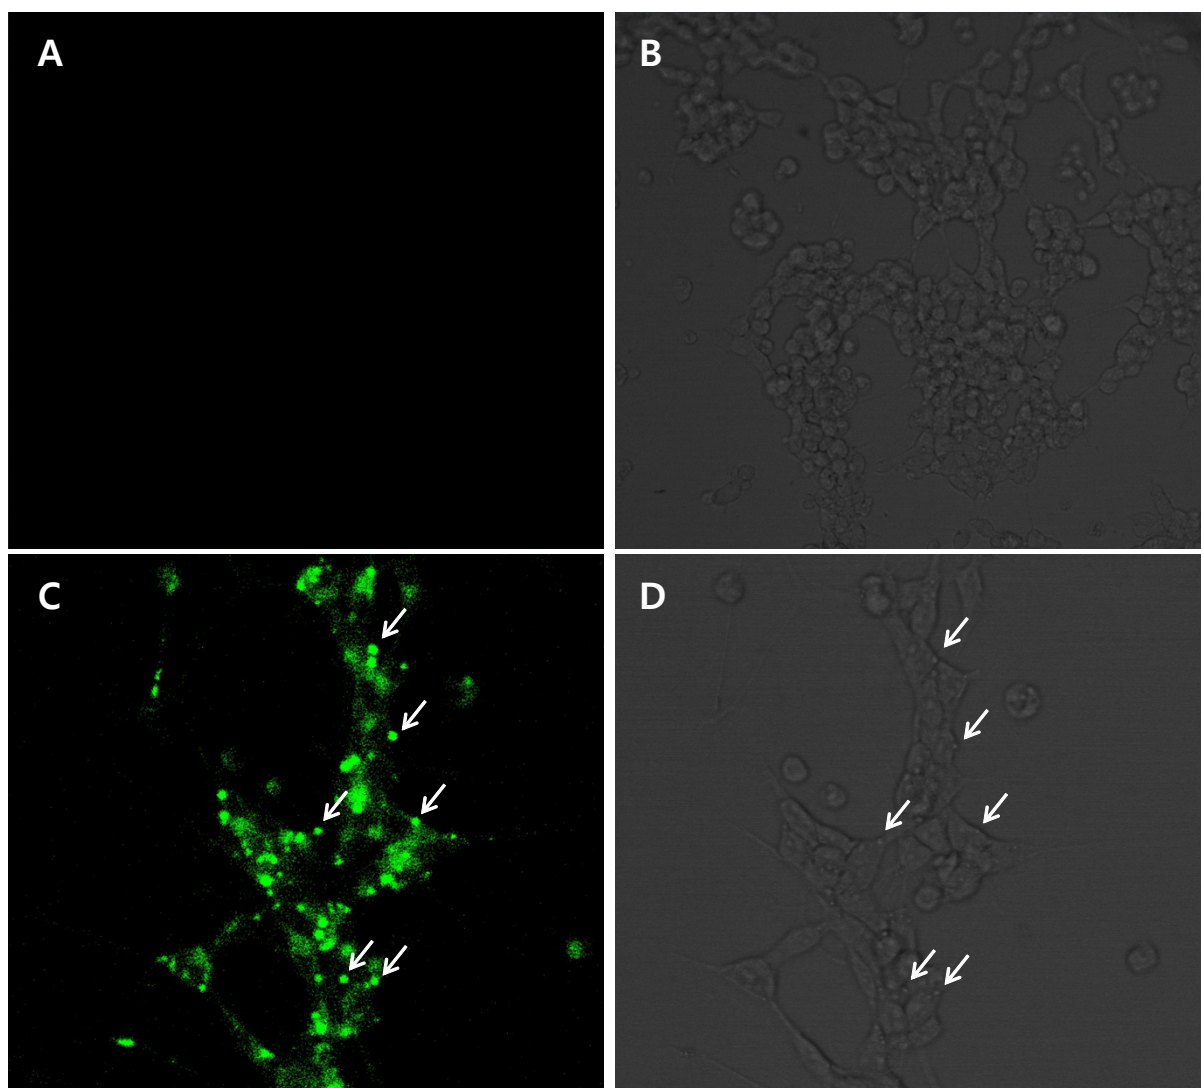

291  
 292

293 **References**

- 294 1. S. H. Chanteau and J. M. Tour, Synthesis of anthropomorphic molecules: The NanoPutians, *J. Org.*  
295 *Chem.* 2003, **68**, 8750.
- 296 2. W. M. Weber, L. A. Hunsaker, S. F. Abcouwer, L. M. Deck, D. L. Van der Jagt, Anti-oxidant  
297 activities of curcumin and related enones. *Bioorg. Med. Chem.* 2005, **13**, 3811.
- 298 3. K. Kim, K. -S. Park, M. K. Kim, H. Choo and Y. Chong, Dicyanovinyl-substituted J147 analogue  
299 inhibits oligomerization and fibrillation of  $\beta$ -amyloid peptides and protects neuronal cells from  $\beta$ -  
300 amyloid-induced cytotoxicity. *Org. Biomol. Chem.* 2015, **13**, 9564.
